# Supplementary material
Source: PubMed Central journal article supplement (PMC8057116)
Supplement: NIHMS1682125-supplement-Supplemental_figures_tables.pdf [file NIHMS1682125-supplement-Supplemental_figures_tables.pdf]

## **Supplemental Information**

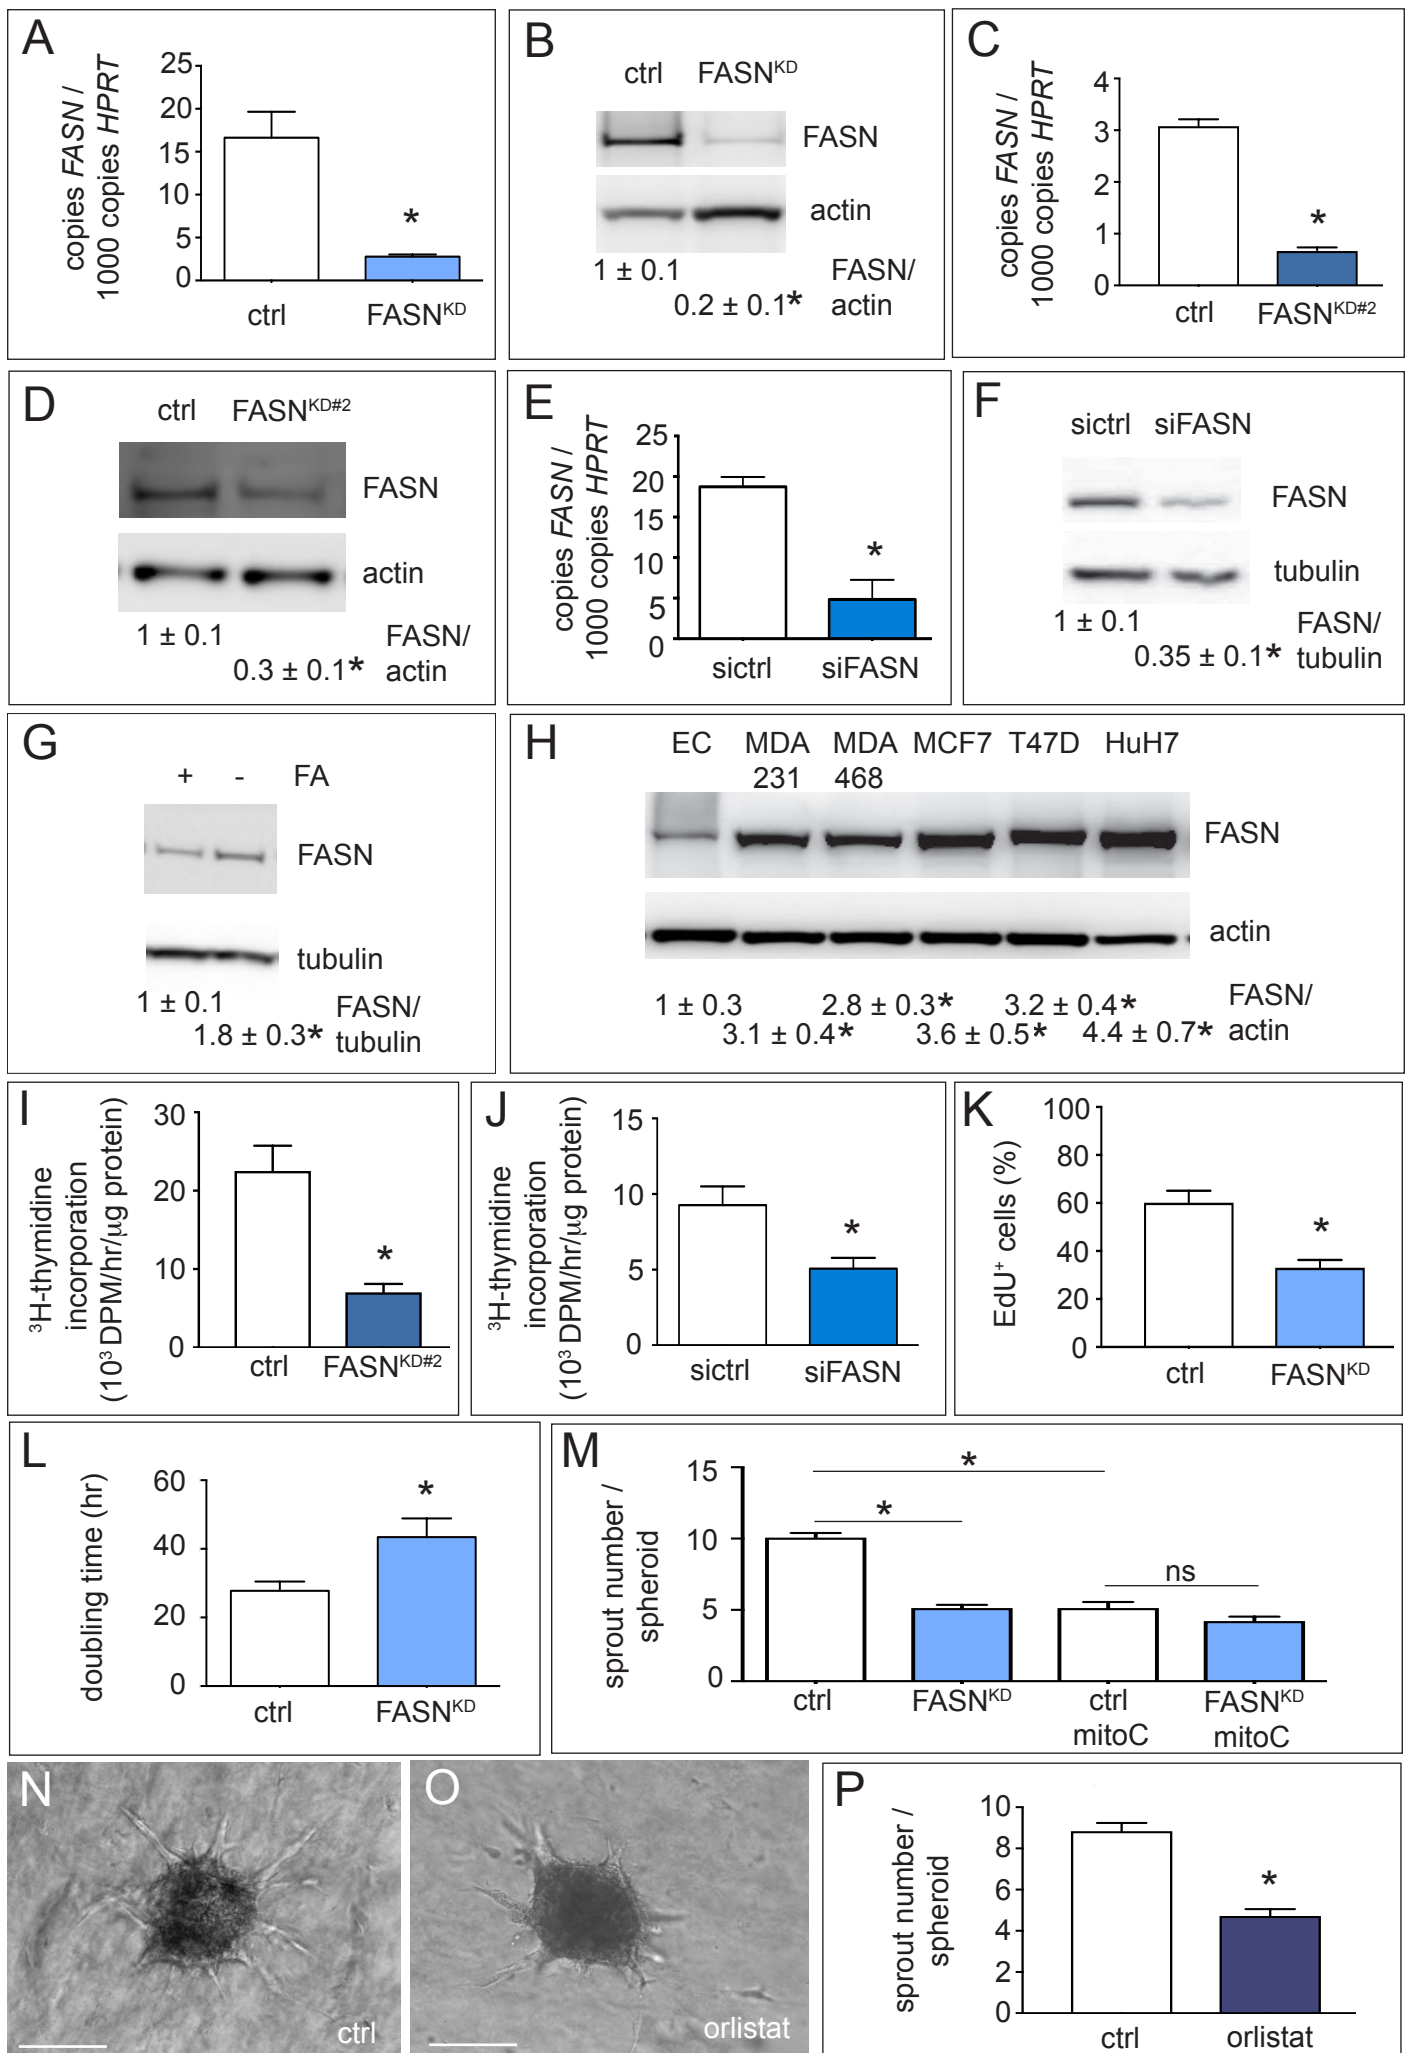

Figure S1

**FIGURE S1 (RELATED TO FIGURE 1):** EXPRESSION OF FASN AND EFFECTS OF *FASN* SILENCING ON EC PROLIFERATION AND SPROUTING

**(A)** *FASN* mRNA levels in control ECs (empty lentiviral vector) and ECs upon *FASN* silencing using a shRNA (*FASN*<sup>KD</sup>) lentiviral vector (n=7). **(B)** Representative immunoblot of *FASN* in control and *FASN*<sup>KD</sup> ECs. Actin was used as loading control. Densitometric quantification of the *FASN* to actin ratio, expressed relative to control, is shown beneath the blot (n=6). **(C)** *FASN* mRNA levels in control ECs (empty lentiviral vector) and ECs upon *FASN* silencing using a second non-overlapping shRNA (*FASN*<sup>KD#2</sup>) lentiviral vector (n=3). **(D)** Representative immunoblot of *FASN* in control and *FASN*<sup>KD#2</sup> ECs. Actin was used as loading control. Densitometric quantification of the *FASN* to actin ratio, expressed relative to control, is shown beneath the blot (n=3). **(E)** *FASN* mRNA levels in control ECs (irrelevant siRNA, sictrl) and in ECs upon *FASN* silencing using a siRNA (si*FASN*) duplex pool (20 nM) (n=3). **(F)** Representative immunoblot of *FASN* in sictrl and si*FASN* ECs. Tubulin was used as loading control. Densitometric quantification of the *FASN* to tubulin ratio, expressed relative to control, is shown beneath the blot (n=3). **(G)** Representative immunoblot of *FASN* in ECs, cultured in medium with fatty acids (FA) or without FAs by using charcoal stripped fetal bovine serum. Tubulin was used as loading control. Densitometric quantification of the *FASN* to tubulin ratio, expressed relative to the FA condition, is shown beneath the blot (n=3). **(H)** Representative immunoblot of *FASN* in ECs, in the breast cancer cell lines MDA-MB-231 (MDA 231), MDA-MD-468 (MDA 468), MCF7, T47D, and in the hepatocellular carcinoma cell line HuH7. Actin was used as loading control. Densitometric quantification of the *FASN* to actin ratio, expressed relative to ECs, is shown beneath the blot (n=3). **(I,J)** <sup>3</sup>H-thymidine incorporation (proliferation assay) in control and *FASN*<sup>KD#2</sup> ECs (n=3) (I) or in sictrl and si*FASN* ECs (n=3) (J). DPM, disintegrations per minute. **(K)** Quantification of EdU<sup>+</sup> ECs after 24 hr EdU labeling in control and *FASN*<sup>KD</sup> ECs as measured by flow cytometry (n=3). **(L)** Quantification of doubling time of control and *FASN*<sup>KD</sup> ECs (n=3). **(M)** Sprout number per EC spheroid of control and *FASN*<sup>KD</sup> EC spheroids with and without mitotic inactivation (mitoC) (n=3). **(N,O)** Representative phase contrast images of EC spheroids cultured with or without the pharmacological *FASN* blocker (orlistat, 10 μM). Scale bars: 200 μm. **(P)** Sprout number per EC spheroid cultured with or without orlistat. Unless

otherwise indicated, FASN shRNA knockdown experiments were performed using FASN<sup>KD#1</sup>. Data are mean  $\pm$  SEM. \*  $p < 0.05$  by ANOVA (M), mixed models (I,J,K,L,P) or standard two-tailed t test with Welch's correction (all other panel); ns, not significant.

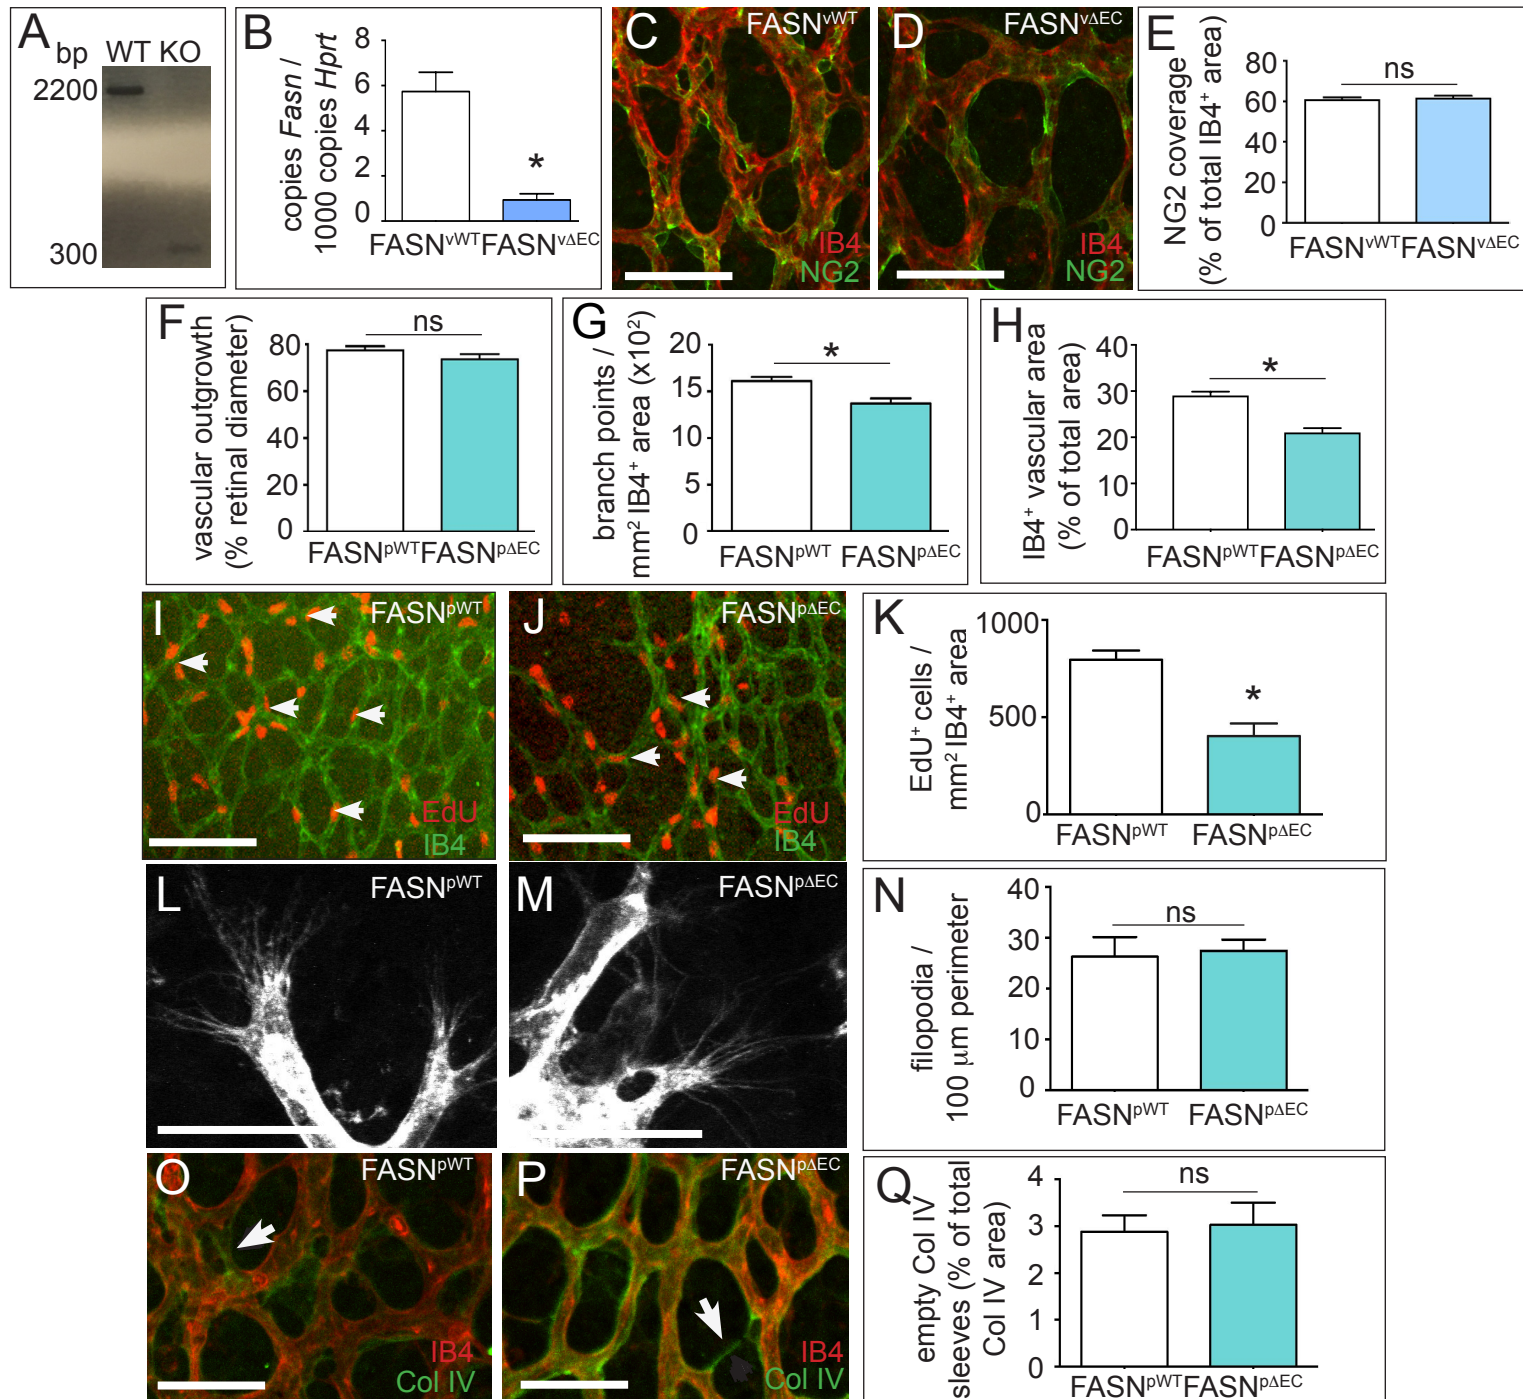

Figure S2

**FIGURE S2 (RELATED TO FIGURE 2): EFFECT OF *FASN* LOSS IN ECs ON PHYSIOLOGICAL ANGIOGENESIS *IN VIVO***

**(A)** Agarose gel image of PCR genotyping of genomic DNA from tamoxifen treated Cre<sup>-</sup> FASN<sup>lox/lox</sup> (WT) and Cre<sup>+</sup> FASN<sup>lox/lox</sup> (KO) mice showing correct excision of the floxed *Fasn* allele in the Cre<sup>+</sup> FASN<sup>lox/lox</sup> mouse, as indicated by the presence of a 300 bp band. **(B)** *Fasn* mRNA levels in ECs isolated from livers of FASN<sup>vWT</sup> and FASN<sup>vΔEC</sup> mice (respectively Cre negative and Cre positive offspring from intercrosses of VE-Cadherin(PAC)-Cre<sup>ERT2</sup> mice with FASN<sup>lox/lox</sup> mice) after tamoxifen injection to induce Cre-activity (n=3 for each genotype). **(C,D)** Representative confocal images of the retinal vasculature of neonatal mice at postnatal day 5 (P5), stained for the pericyte marker NG2 (green) and the EC marker Isolectin-B4 (IB4) (red), in FASN<sup>vWT</sup> and FASN<sup>vΔEC</sup> mice. Scale bars: 50 μm. **(E)** Quantification of pericyte coverage in FASN<sup>vWT</sup> (n=5) and FASN<sup>vΔEC</sup> (n=7) neonatal mice. **(F)** Quantification of retinal vascular outgrowth in FASN<sup>pWT</sup> (n=15) and FASN<sup>pΔEC</sup> (n=18) neonatal mice (respectively Cre negative and Cre positive offspring from intercrosses of PDGFb(PAC)-Cre<sup>ERT2</sup> mice with FASN<sup>lox/lox</sup> mice) after tamoxifen injection to induce Cre-activity. **(G)** Number of branch points in the retinal vasculature of FASN<sup>pWT</sup> (n=15) and FASN<sup>pΔEC</sup> (n=18) neonatal mice. **(H)** Quantification of IB4<sup>+</sup> retinal vascular area (expressed as % of total area) in FASN<sup>pWT</sup> (n=7) and FASN<sup>pΔEC</sup> mice (n=7). **(I,J)** Representative confocal images of the retinal vasculature of neonatal mice, stained for EdU (red) and the EC marker IB4 (green), in FASN<sup>pWT</sup> (I) and FASN<sup>pΔEC</sup> (J) mice. Arrows denote EdU<sup>+</sup> IB4<sup>+</sup> ECs. Scale bars: 100 μm. **(K)** Quantification of proliferating EdU<sup>+</sup> ECs in the retinal vasculature (front of the plexus) of FASN<sup>pWT</sup> (n=6) and FASN<sup>pΔEC</sup> (n=7) neonatal mice. **(L,M)** Representative high-magnification confocal images of the retinal vascular front (IB4 staining) in FASN<sup>pWT</sup> (L) and FASN<sup>pΔEC</sup> (M) neonatal mice. Scale bars: 25 μm. **(N)** Number of filopodia per 100 μm perimeter of the retinal vascular front in FASN<sup>pWT</sup> (n=6) and FASN<sup>pΔEC</sup> (n=7) neonatal mice. **(O,P)** Representative confocal images of the retinal vasculature stained for the EC marker IB4 (red) and the basement membrane marker collagen IV (Col IV) (green), in FASN<sup>pWT</sup> (O) and FASN<sup>pΔEC</sup> (P) neonatal mice. Arrows indicate isolectin-B4<sup>-</sup> collagen IV<sup>+</sup> empty sleeves (green vascular profiles consisting only of green basement membrane without red ECs). Scale bars: 50 μm. **(Q)** Quantification of the percentage of Isolectin-B4<sup>-</sup> collagen IV<sup>+</sup> empty sleeves compared to the total collagen IV<sup>+</sup> vascular area in FASN<sup>pWT</sup> (n=8) and FASN<sup>pΔEC</sup> (n=10) neonatal mice. Data are mean ± SEM. \* p < 0.05 by standard two-tailed t-

test; ns, not significant.

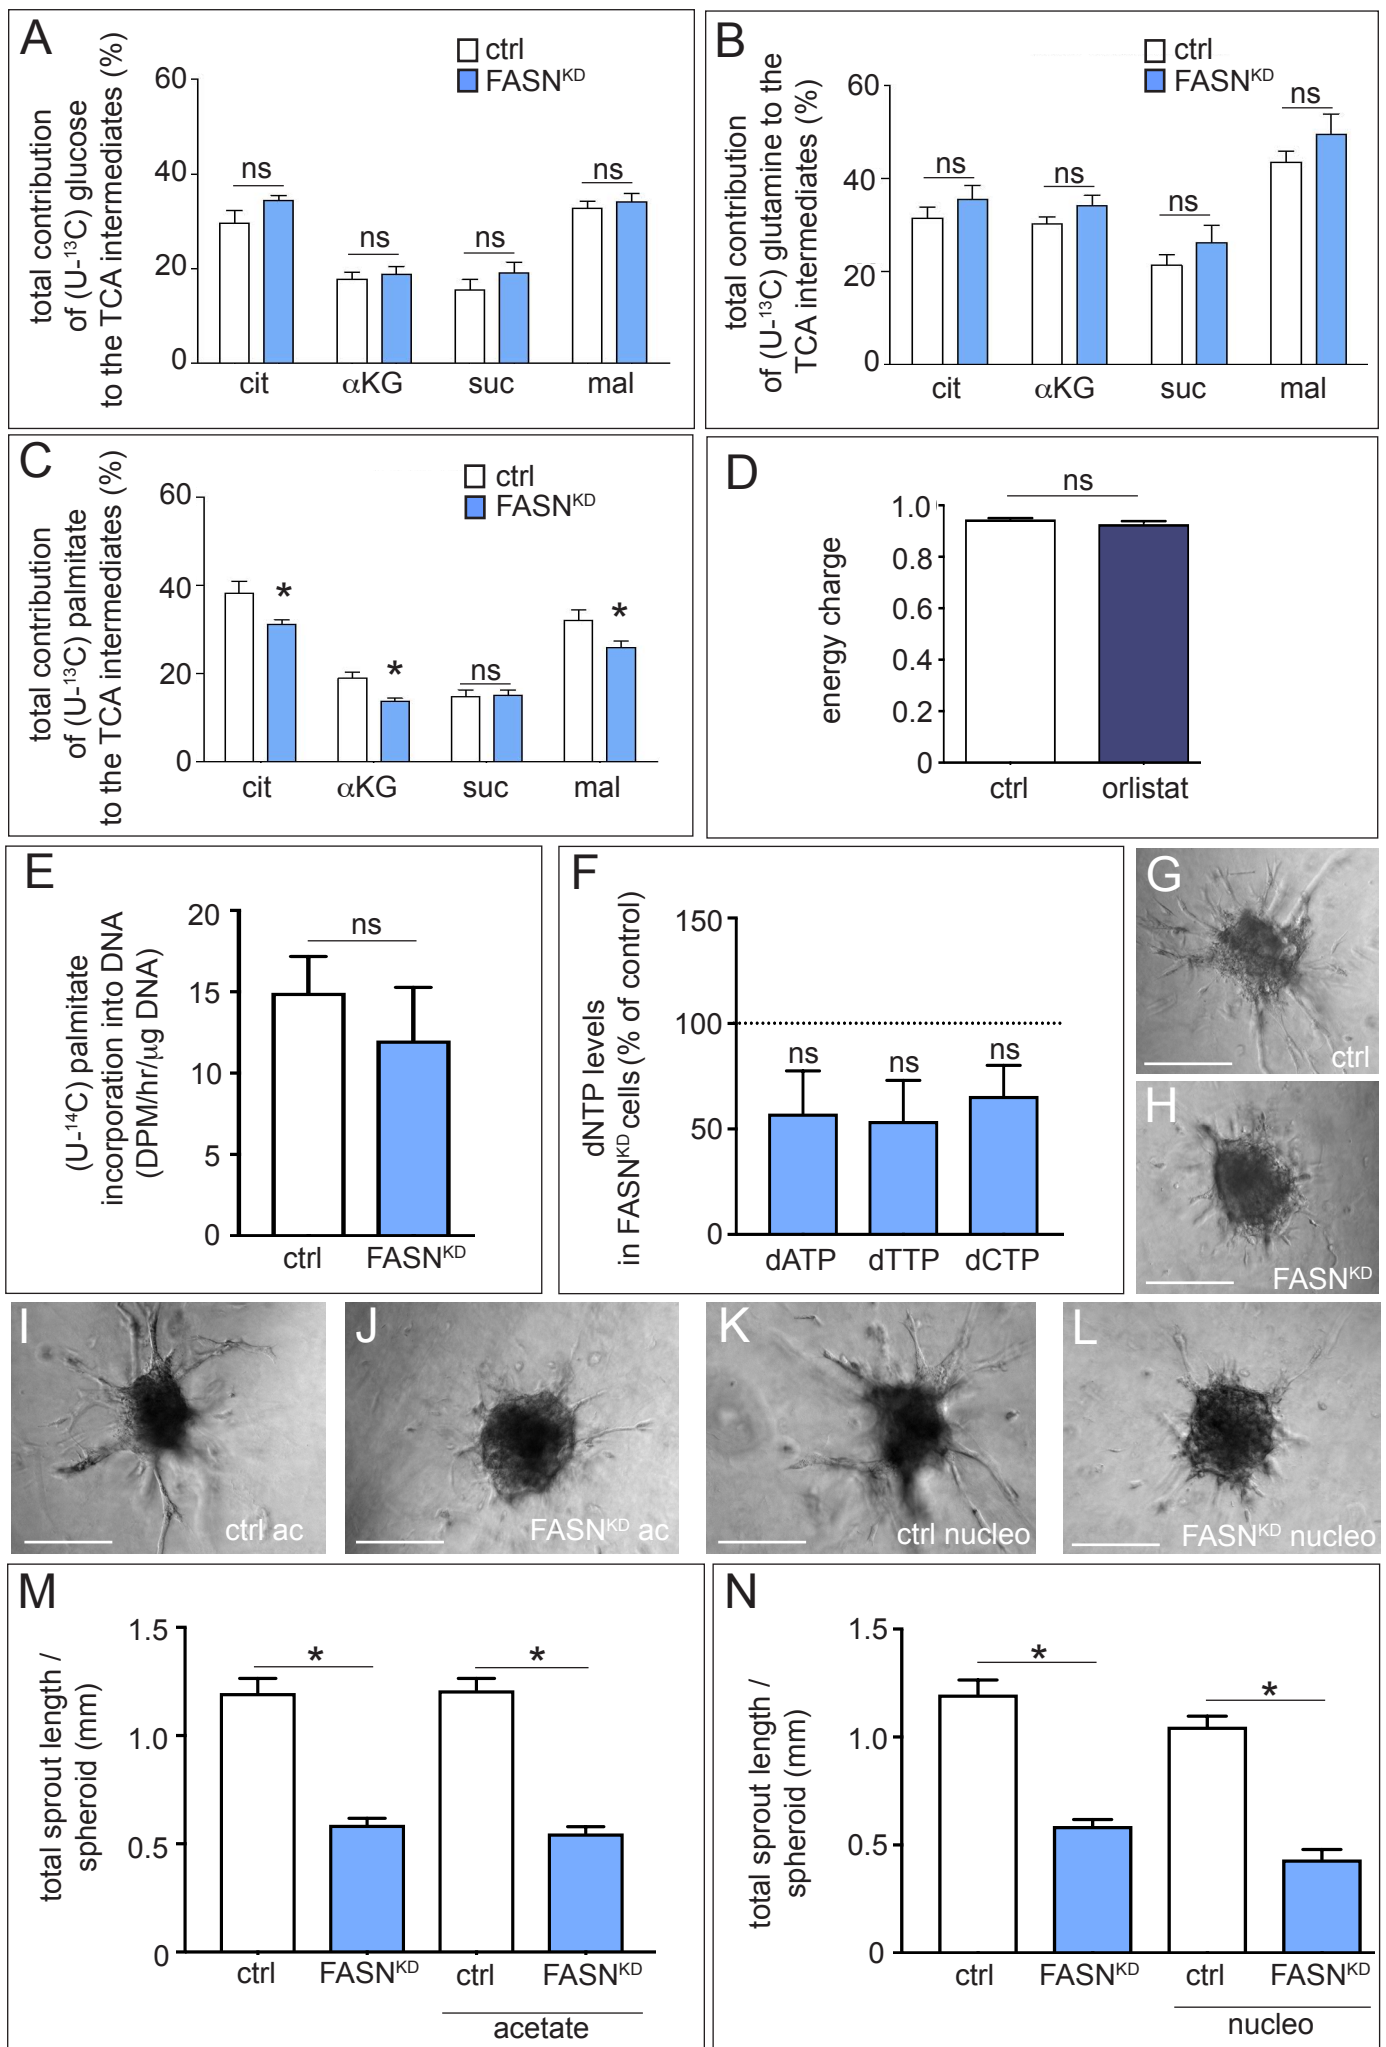

Figure S3



**FIGURE S3 (RELATED TO FIGURE 3): EFFECT OF *FASN* SILENCING ON EC METABOLISM**

**(A-C)**  $^{13}\text{C}$  tracing analysis of the total contribution of  $^{13}\text{C}$  carbons from glucose (A), glutamine (B) or palmitate (C) to the TCA intermediates citrate (cit),  $\alpha$ -ketoglutarate ( $\alpha\text{KG}$ ), succinate (suc) and malate (mal) in control and *FASN*<sup>KD</sup> ECs (n=3). **(D)** Effect of *FASN* blockade in ECs using orlistat (10  $\mu\text{M}$ ) on energy charge ( $([\text{ATP}] + 1/2 [\text{ADP}]) / ([\text{ATP}] + [\text{ADP}] + [\text{AMP}])$ ) (n=3). **(E)**  $^{14}\text{C}$ -palmitate incorporation into DNA in control and *FASN*<sup>KD</sup> ECs (n=6). DPM, disintegrations per minute. Label incorporation from [U- $^{14}\text{C}$ ]-palmitate into DNA was not altered by *FASN*<sup>KD</sup> likely because the reduction in FAO (see Fig. 3D) was insufficient to impair DNA synthesis (an EC proliferation defect caused by impaired DNA synthesis only occurs when FAO is reduced by 70% (Schoors et al., 2015)). **(F)** dNTP levels in *FASN*<sup>KD</sup> ECs compared to control (dashed line) (n=6). **(G,H)** Representative phase contrast images of EC spheroids with control (ctrl) or *FASN*<sup>KD</sup> ECs (n=3). Scale bars: 150  $\mu\text{m}$ . **(I,J)** Representative phase contrast images of EC spheroids with control (ctrl) (I) or *FASN*<sup>KD</sup> (J) ECs grown in medium supplemented with acetate (ac) (10 mM). Scale bars: 150  $\mu\text{m}$ . **(K,L)** Representative phase contrast images of EC spheroids with control (ctrl) (K) or *FASN*<sup>KD</sup> (L) ECs grown in medium supplemented with nucleotides (nucleo) (500  $\mu\text{M}$  per nucleotide). Scale bars: 150  $\mu\text{m}$ . **(M)** Quantification of total sprout length of control (ctrl) and *FASN*<sup>KD</sup> spheroids grown in medium without or with supplementation with acetate (10 mM) (n=3). **(N)** Quantification of total sprout length of control (ctrl) and *FASN*<sup>KD</sup> spheroids grown in medium without or with supplementation with 500  $\mu\text{M}$  of each nucleotide (nucleo) (n=3). No rescue of the sprouting defect of *FASN*<sup>KD</sup> ECs was observed by addition of either acetate or nucleotides to the medium. If the decreased proliferation of *FASN*<sup>KD</sup> ECs would be due to a reduction in FAO, then supplementation of acetate (which can be converted to acetyl-CoA in ECs (Schoors et al., 2015)) or nucleotides would be expected to rescue the proliferation defect. Data are mean  $\pm$  SEM. \*  $p < 0.05$  by mixed models (A-C), ANOVA (F,M,N) or standard two-tailed t test with Welch's correction (D,E); ns, not significant.

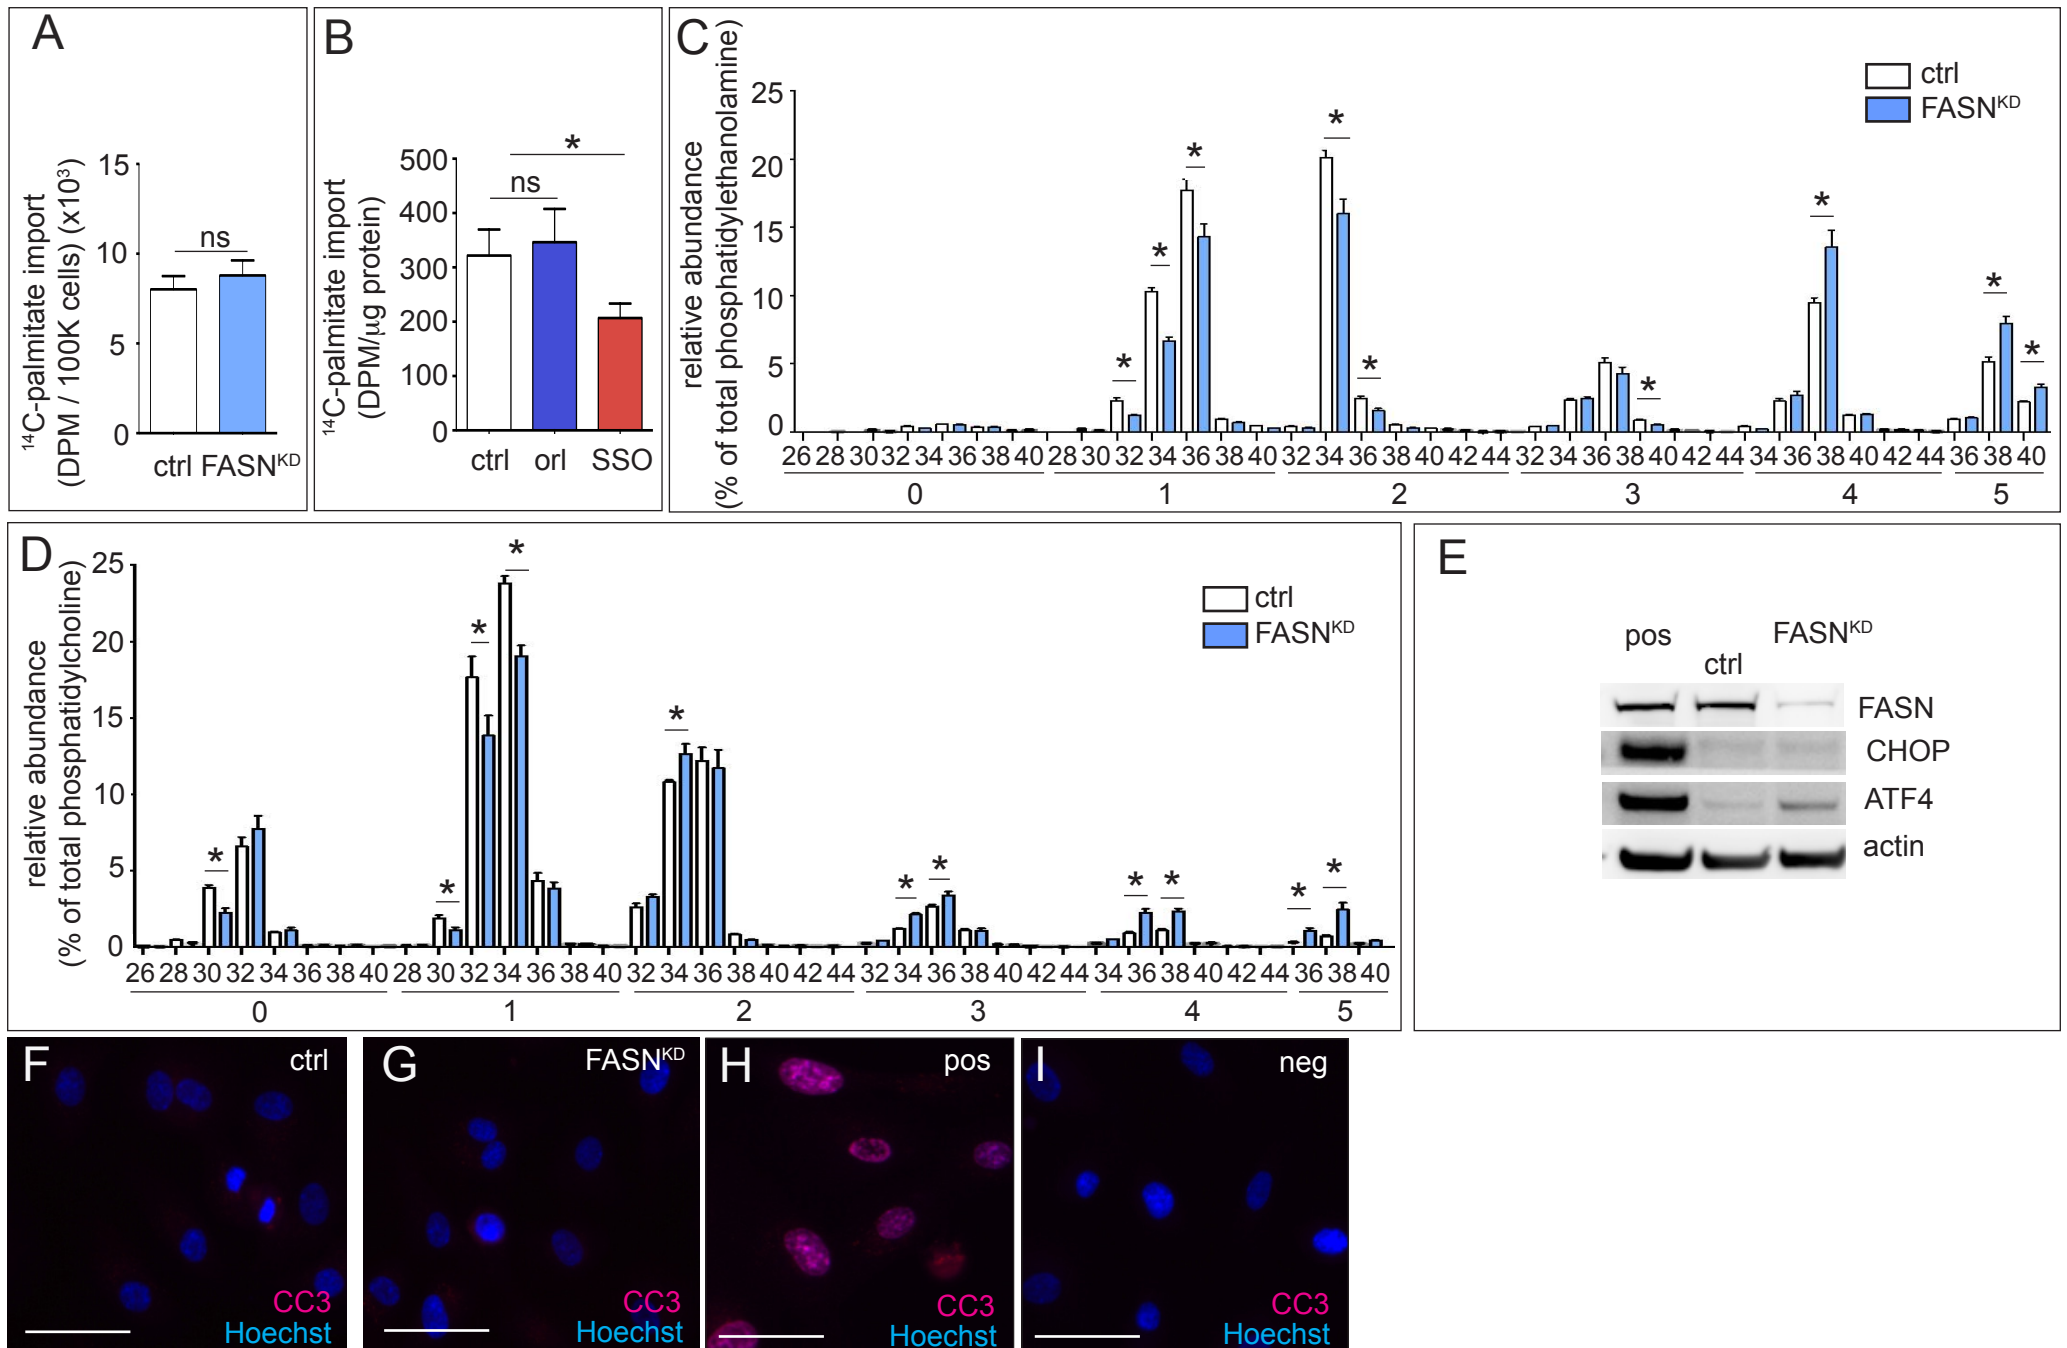

Figure S4

**FIGURE S4 (RELATED TO FIGURE 3 AND 4): EFFECT OF *FASN* SILENCING ON PALMITATE LEVELS**

**(A)** Quantification of fatty acid ([U-<sup>14</sup>C]-palmitate) import in control and *FASN*<sup>KD</sup> ECs (n=3). DPM, disintegrations per minute. **(B)** Quantification of fatty acid ([U-<sup>14</sup>C]-palmitate) import in control, orlistat (orl) or sulfo-N-succinimidyl oleate (SSO) treated ECs (n=3). DPM, disintegrations per minute. **(C,D)** Lipidomic analysis, showing the abundance of saturated, mono-, di- and poly-unsaturated phosphatidyl-ethanolamine (C) and phosphatidylcholine (D) membrane lipids in control and *FASN*<sup>KD</sup> ECs (n=3). The numbers under the axes indicate the carbon length of the fatty acid for the different phospholipid species within each group of unsaturation degree (zero to 5). This analysis revealed a moderate decrease in the fraction of mono-unsaturated and increase of poly-unsaturated fatty acyl chains in *FASN*<sup>KD</sup> ECs, reflecting reduced palmitate synthesis. In mammalian cells, *de novo* FAS produces saturated fatty acids that can be converted to mono-unsaturated but not to poly-unsaturated species, the latter of which are taken up from the diet (Rysman et al., 2010). Thus, our lipidomics data may suggest that *FASN*<sup>KD</sup> ECs display an increased activity of desaturases and/or an increased uptake of poly-unsaturated lipid species. **(E)** Representative immunoblot of ER stress marker CHOP and ATF4 in control and *FASN*<sup>KD</sup> ECs. Actin was used as loading control, thapsigargin (200 nM) was used as positive control (pos) (n=4). Despite a moderate increase in ATF4 levels in *FASN*<sup>KD</sup> ECs, the protein levels of CHOP (a marker of chronic ER stress and apoptosis) were not elevated by *FASN*<sup>KD</sup>. **(F-I)** Representative images of cleaved caspase 3 (CC3) and Hoechst nuclear staining of control (ctrl) (F) and *FASN*<sup>KD</sup> ECs (G). Doxorubicin (2 μM) was used as positive (pos) control (H). Negative control was performed without primary antibody for CC3 (neg) (I). Scale bars: 50 μm. Data are mean ± SEM. \* p < 0.05 by standard two-tailed t-test (C,D), ANOVA (B) or standard two-tailed t test with Welch's correction (A); ns, not significant.

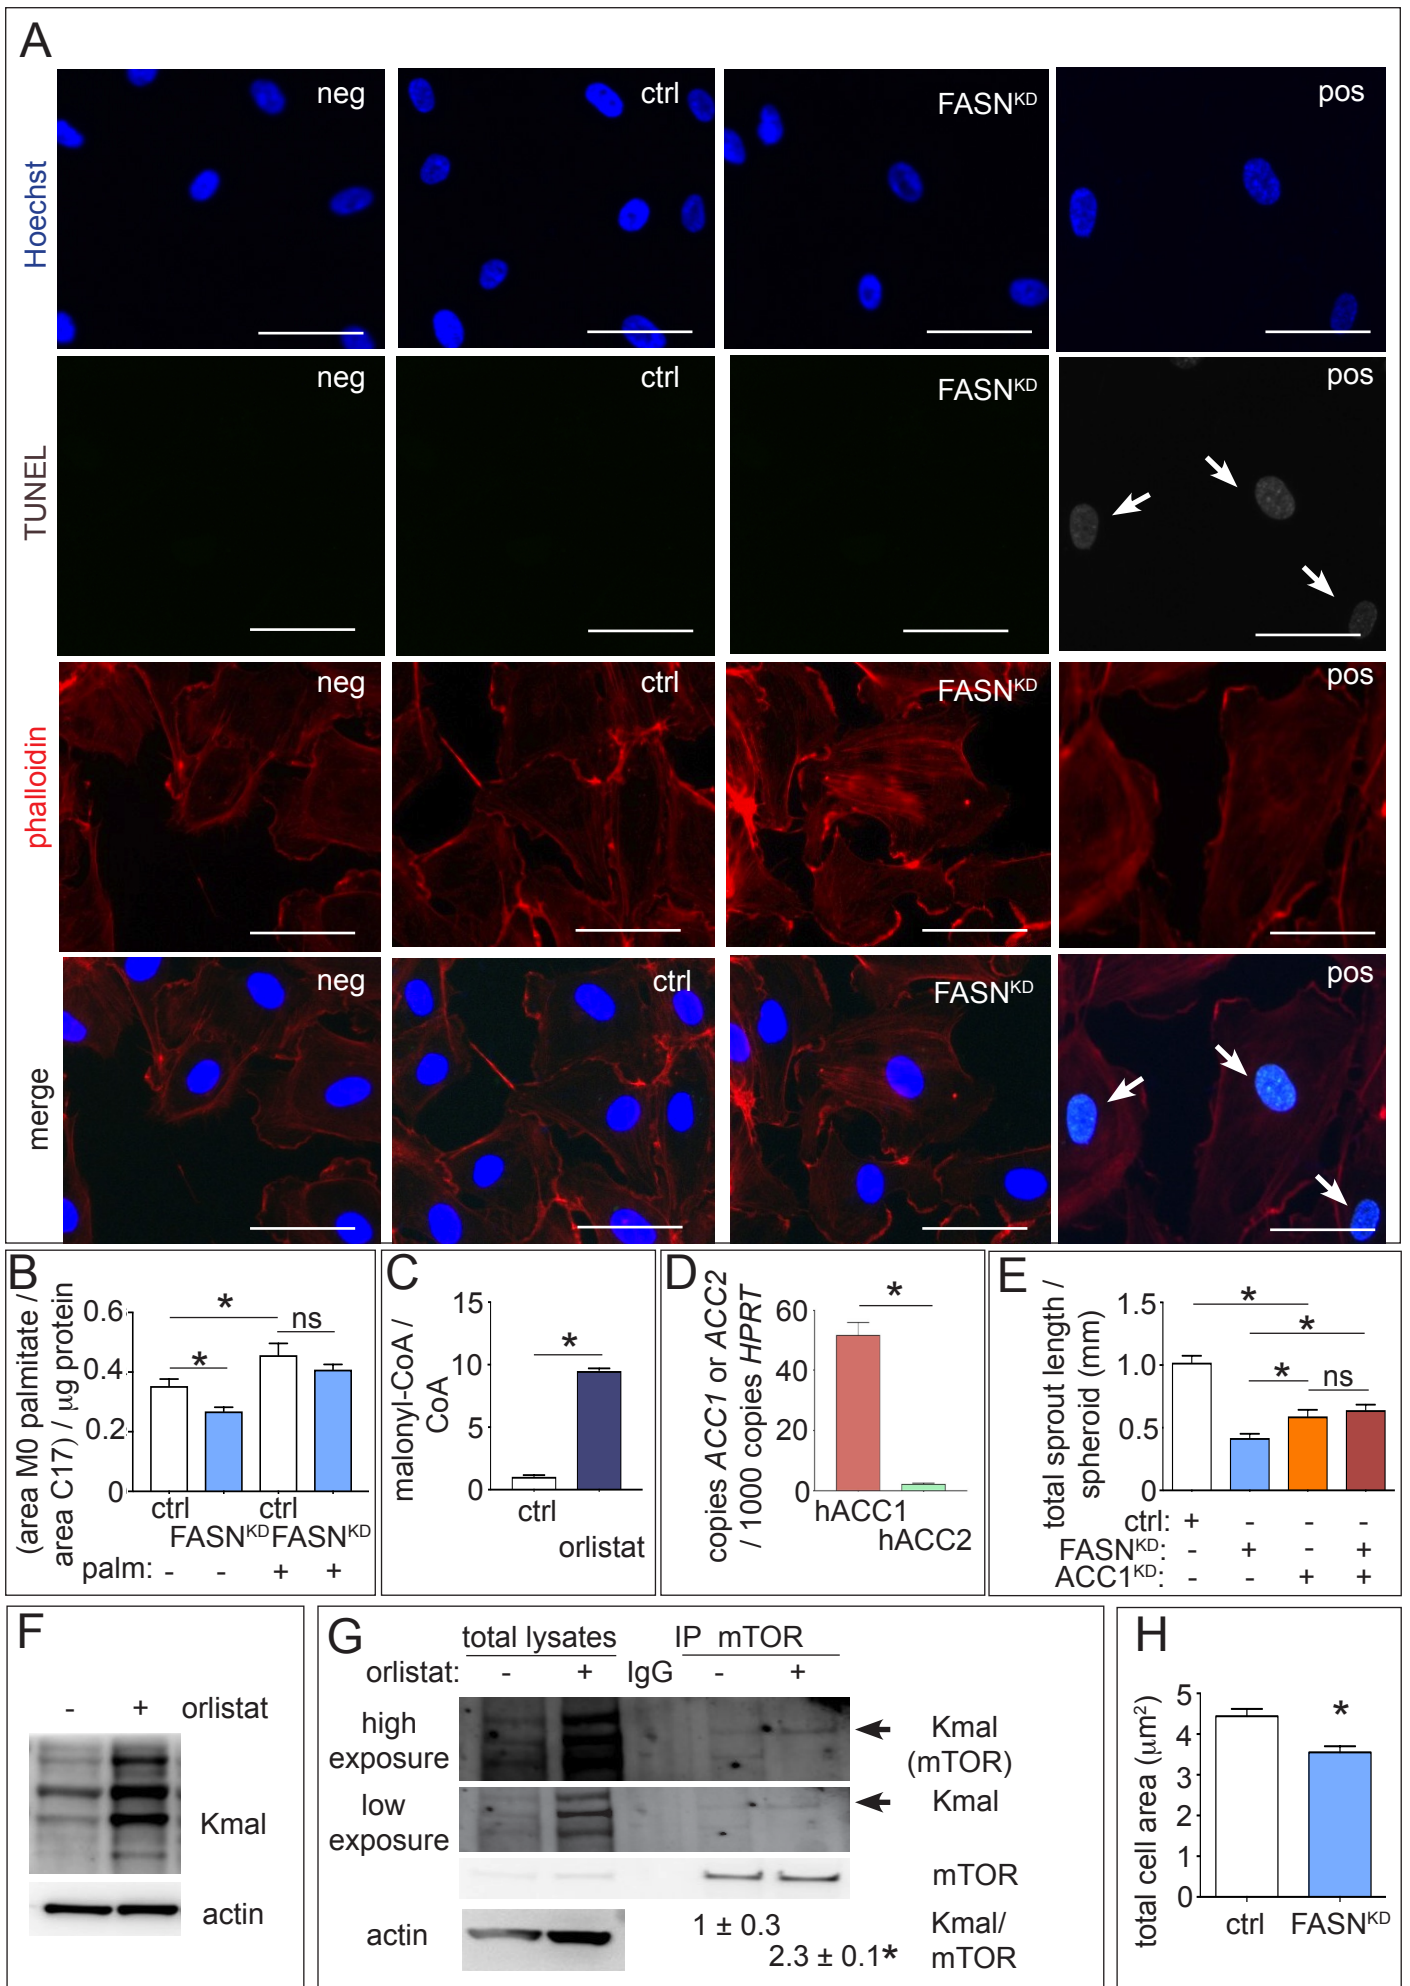

Figure S5

**FIGURE S5 (RELATED TO FIGURE 4 AND 5): EFFECT OF *FASN* OR *ACC1* SILENCING ON MALONYL-COA LEVELS**

**(A)** TUNEL (white in the single signal channel image and green in the merged image), Hoechst nuclear staining (blue) and phalloidin / actin staining (red) of control (ctrl) and *FASN*<sup>KD</sup> ECs. Doxorubicin treatment (2  $\mu$ M) of control ECs was used as positive control (pos), vehicle treatment as negative control (neg). Arrows denote apoptotic cells. EC apoptosis in *FASN*<sup>KD</sup> ECs was very rare (precluding meaningful quantitation), suggesting that the activation of the ER stress pathway was insufficient to cause cellular demise. Scale bars: 50  $\mu$ m. **(B)** Quantification of intracellular palmitate levels (normalized to the standard C17 peak area) in control and *FASN*<sup>KD</sup> ECs without or with supplementation with palmitate (palm) (50  $\mu$ M) (n=3). **(C)** Malonyl-CoA / CoA ratio in control and orlistat treated ECs (n=3). **(D)** Acetyl-CoA carboxylase-1 and -2 (hACC1, hACC2) mRNA expression levels in ECs (n=3). **(E)** Total sprout length in spheroids using control ECs and ECs with single or combined knockdown of *FASN* (*FASN*<sup>KD</sup>) and *ACC1* (*ACC1*<sup>KD</sup>) (n=3). **(F)** Representative immunoblot of lysine malonylated (Kmal) proteins in control and orlistat treated ECs. Actin was used as loading control. **(G)** Representative immunoblot of immunoprecipitated (IP) mTOR and immunoblotting for lysine malonylation (Kmal) or mTOR in control and orlistat treated ECs. Actin was used as loading control for total lysates. IgG, negative control for IP. Different exposure images of the blot are shown for visualization of the total lysates (low exposure) and Kmal mTOR (high exposure). Densitometric quantification of the Kmal mTOR to mTOR ratio, expressed relative to untreated ECs, is shown beneath the blot (n=3). **(H)** Quantification of cell size of control and *FASN*<sup>KD</sup> ECs, measured on fixed monolayers stained for actin (phalloidin) to visualize cell shape (n=3). Data are mean  $\pm$  SEM. \*  $p < 0.05$  by ANOVA (B,E) or standard two-tailed t test with Welch's correction (C,D,G,H); ns, not significant.

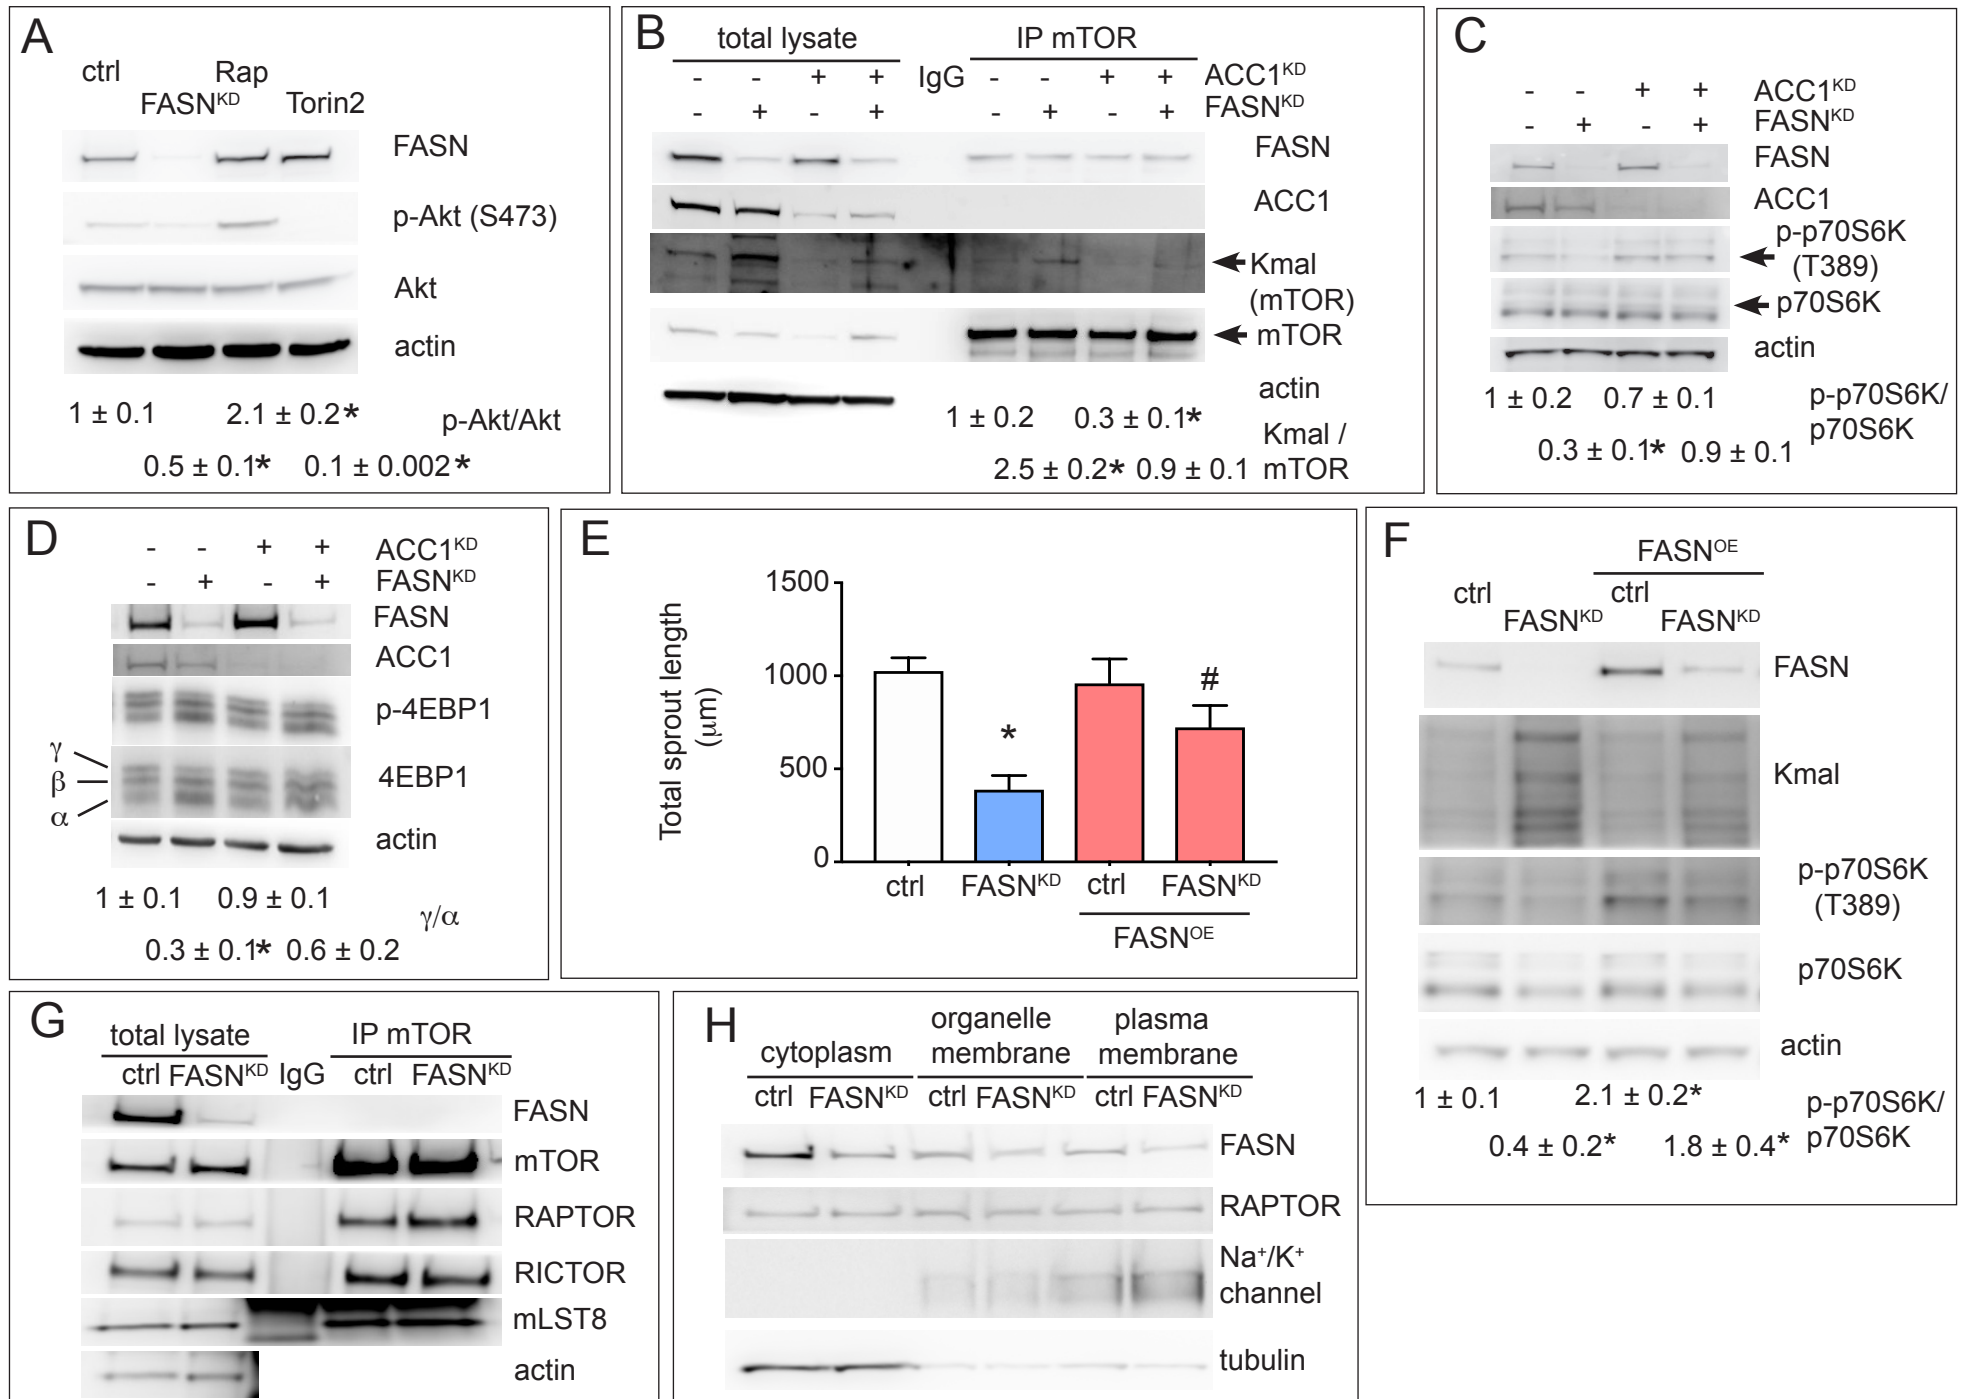

Figure S6

**FIGURE S6 (RELATED TO FIGURE 5): EFFECT OF *FASN* SILENCING ON MALONYLATION OF mTOR**

**(A)** Representative immunoblot of *FASN* and of phosphorylated (p-Akt (S473)) and total Akt (downstream target of mTORC2) in control and *FASN*<sup>KD</sup> ECs. Actin was used as loading control. The mTORC1 inhibitor rapamycin (Rap) (20 nM) and mTORC1/2 inhibitor Torin2 (100 nM) were used as negative and positive controls, respectively. Densitometric quantification of the p-Akt / Akt ratio, expressed relative to control, is shown beneath the blots (n=3). The *FASN* and actin shown here are the same as in Fig. 5F, since Akt and 4EBP1 were probed in the same membrane. **(B)** Representative immunoblot of immunoprecipitated (IP) mTOR and immunoblotting for *FASN*, ACC1, mTOR and lysine malonylation (Kmal) in ECs with single or combined *FASN*<sup>KD</sup> and ACC1<sup>KD</sup>. Actin was used as loading control for the total lysates controls (left). IgG, negative control for IP. Densitometric quantification of malonylated mTOR (Kmal/mTOR ratio), expressed relative to non-silenced ECs, is shown beneath the blot (n=3). **(C)** Representative immunoblot of *FASN*, ACC1, and of total (p70S6K) and phosphorylated (p-p70S6K) downstream target of mTORC1 p70S6K in ECs with single or combined silencing of *FASN* (*FASN*<sup>KD</sup>) and ACC1 (ACC1<sup>KD</sup>). Actin was used as loading control. Densitometric quantification of the p-p70S6K / p70S6K ratio, expressed relative to non-silenced ECs, is shown beneath the blots (n=3). **(D)** Representative immunoblot of *FASN*, ACC1, and of total (4EBP1) and phosphorylated (p-4EBP1) downstream target of mTORC1 4EBP1 in ECs with single or combined silencing of *FASN* (*FASN*<sup>KD</sup>) and ACC1 (ACC1<sup>KD</sup>). Actin was used as loading control. Densitometric quantification of the ratio of the high phosphorylated  $\gamma$  to low phosphorylated  $\alpha$  form of 4EBP1, expressed relative to non-silenced ECs, is shown beneath the blots (n=3). **(E)** Total sprout length in EC spheroids using control and *FASN*<sup>KD</sup> ECs, with or without overexpression of shRNA-resistant *FASN* (*FASN*<sup>OE</sup>) (n=5). **(F)** Representative immunoblot of *FASN*, lysine malonylation (Kmal) and of total (p70S6K) and phosphorylated (p-p70S6K) in control and *FASN*<sup>KD</sup> ECs, with or without overexpression of *FASN* (*FASN*<sup>OE</sup>); even though *FASN*<sup>OE</sup> was designed to be fully resistant to shRNA-mediated silencing, *FASN*<sup>KD</sup> still partially lowered overexpressed *FASN* levels in *FASN*<sup>OE</sup> cells; nonetheless the residual *FASN* levels in *FASN*<sup>KD</sup>/*FASN*<sup>OE</sup> cells still sufficed to induce a partial rescue. Actin was used as loading control. Densitometric quantification of the p-p70S6K / p70S6K ratio, expressed relative to control ECs, is shown beneath the blots (n=3). **(G)** Representative

immunoblot of immunoprecipitated (IP) mTOR and immunoblotting for FASN, mTOR and co-immunoprecipitated RAPTOR, RICTOR, and mLST8 in control and FASN<sup>KD</sup> ECs. Actin was used as loading control for the total lysate controls (left). IgG, negative control for IP. **(H)** Representative immunoblot of the cytoplasmic, organelle membrane and plasma membrane protein fraction of total EC lysates, for FASN and RAPTOR (as component of mTORC1) in control and FASN<sup>KD</sup> ECs. Immunoblotting for tubulin and Na<sup>+</sup>/K<sup>+</sup> channel, markers respectively enriched in the cytoplasm and plasma membrane fraction, were included to verify membrane fractionation. Data are mean  $\pm$  SEM. \*  $p < 0.05$  versus control (A-F) and #  $p < 0.05$  versus FASN<sup>KD</sup> (E) by standard two-tailed t test with Welch's correction; ns, not significant.



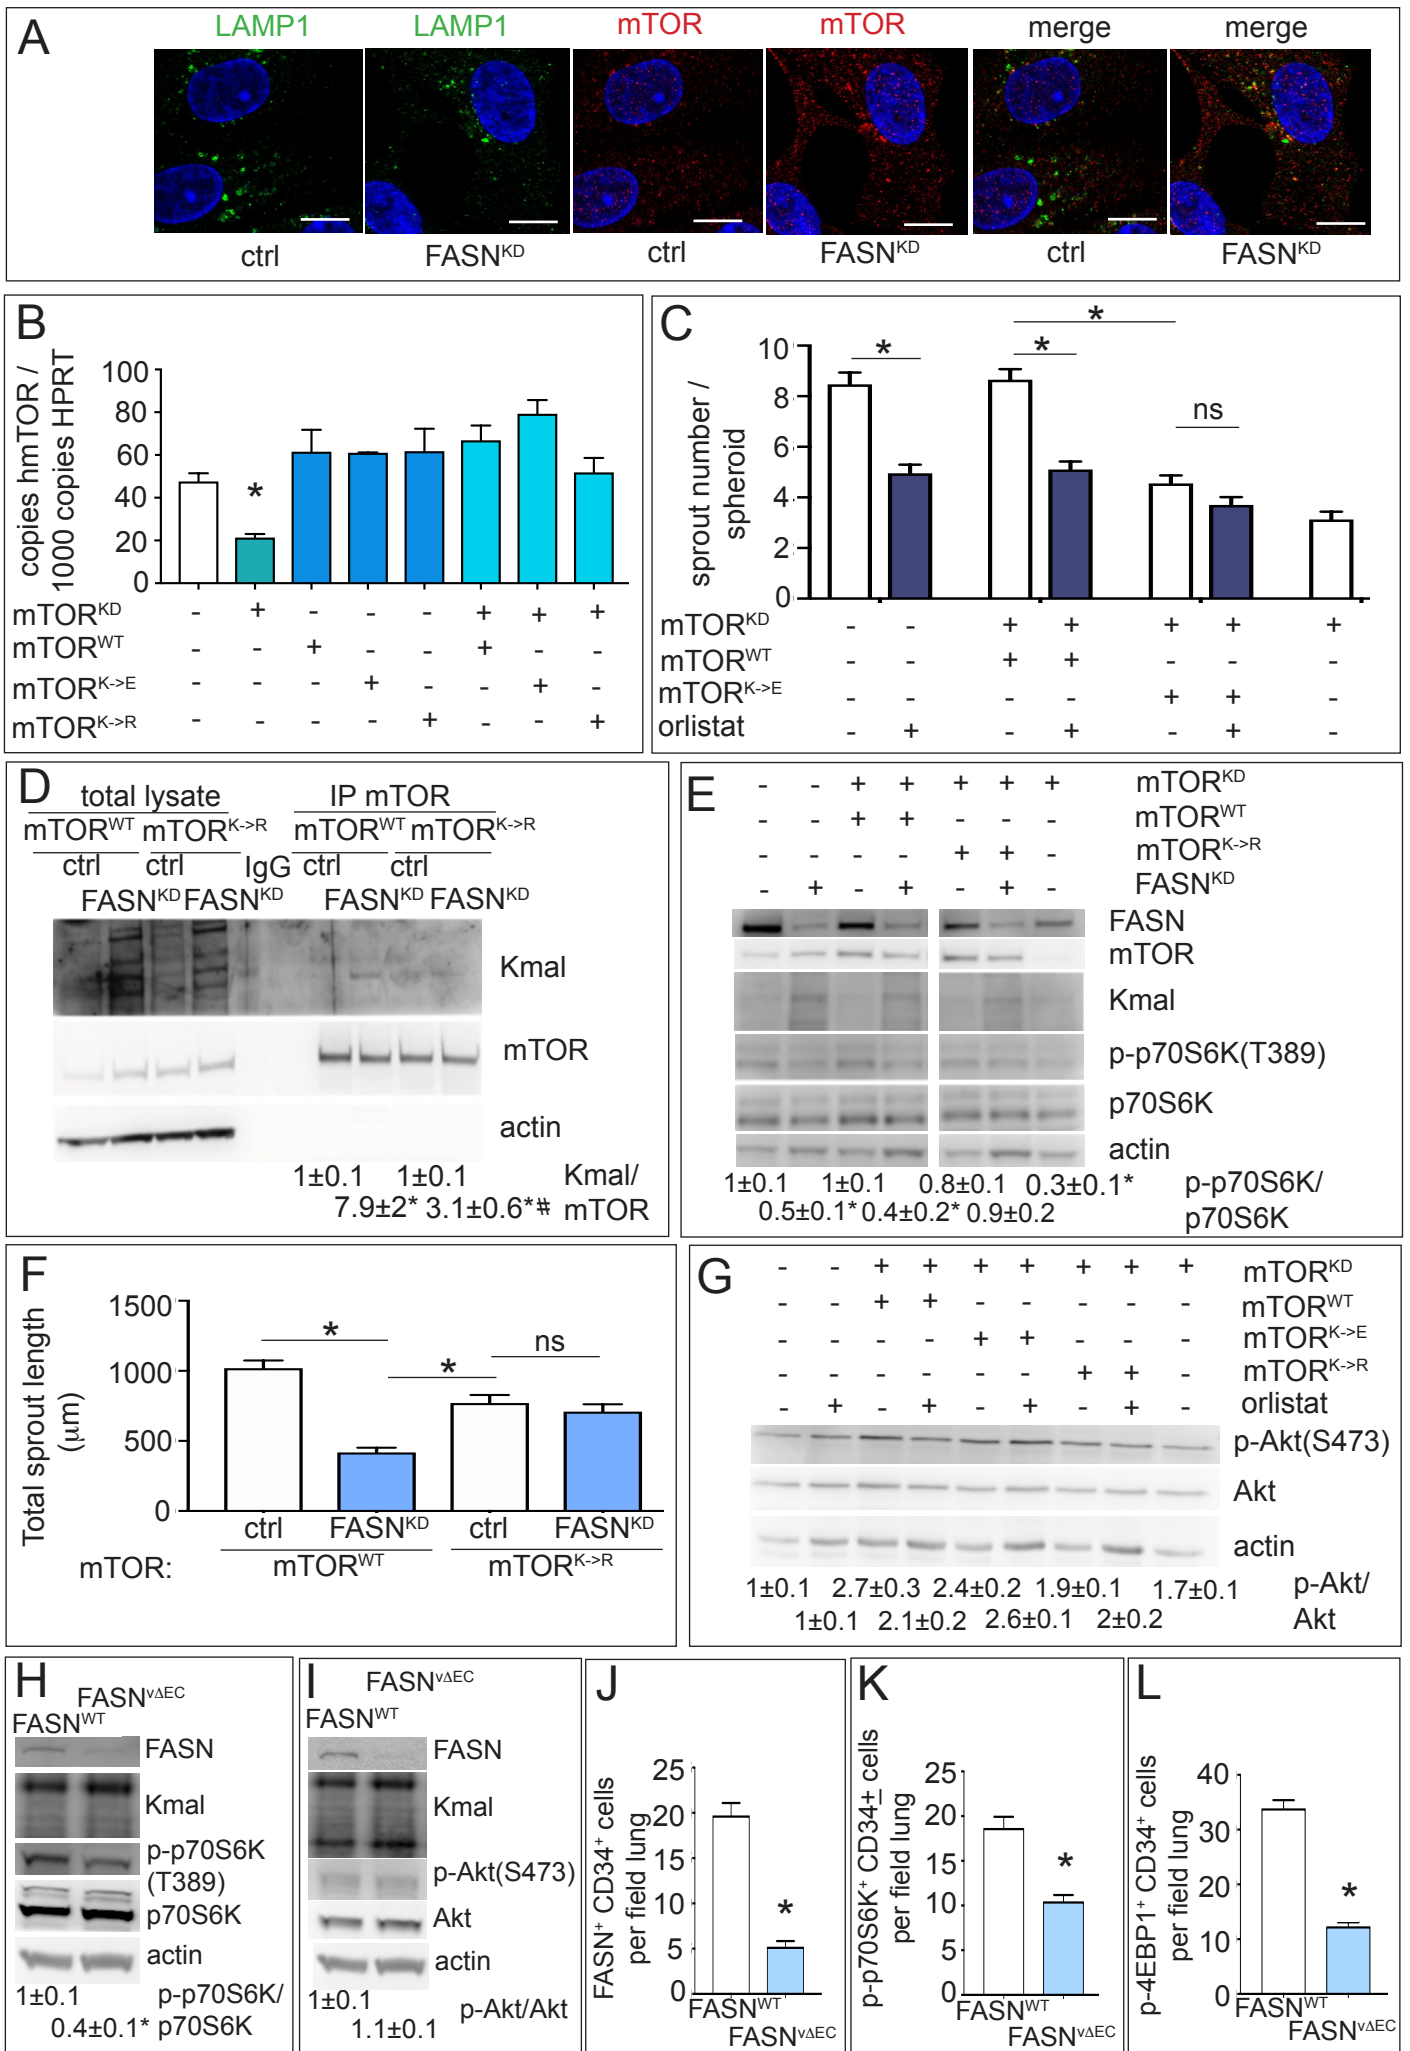

Figure S7

**FIGURE S7 (RELATED TO FIGURE 6): ROLE OF LYSINE 1218 IN THE REGULATION OF MTOR ACTIVITY UPON FASN BLOCKADE**

**(A)** Representative immunostaining for the lysosome marker LAMP1 (green), mTOR (red), and Hoechst nuclear (blue) staining of control (ctrl) and FASN<sup>KD</sup> ECs to assess mTOR localization to the lysosome. Scale bars: 10  $\mu$ m. **(B)** *mTOR* mRNA expression levels in control ECs and in ECs with single or combined silencing of wild type *mTOR* (mTOR<sup>KD</sup>) and overexpression of a wild-type mTOR construct (mTOR<sup>WT</sup>), an mTOR mutant construct harboring a K1218E (mTOR<sup>K->E</sup>) mutation, or mTOR mutant construct harboring a K1218R (mTOR<sup>K->R</sup>). The mTOR<sup>WT</sup>, mTOR<sup>K->E</sup>, and mTOR<sup>K->R</sup> constructs are mTOR<sup>KD</sup> resistant (n=3). **(C)** Sprout number per EC spheroid from spheroids shown in Figure 6G-M, using control and orlistat treated ECs, with single or combined silencing of wild type *mTOR* (mTOR<sup>KD</sup>) and overexpression of a wild type mTOR construct (mTOR<sup>WT</sup>) or an mTOR mutant construct harboring a K1218E (mTOR<sup>K->E</sup>) mutation (n=3). The effects of the mTOR<sup>K->E</sup> mutant are quantitatively very similar to those of FASN<sup>KD</sup>, which was unexpected given a malonylation stoichiometry of close to 100% for the mTOR<sup>K->E</sup> mutant while only 4.5% for FASN<sup>KD</sup>. However, the lack of difference may relate to the fact that the glutamic acid mutant is not an absolute accurate model of constitutive malonylation, since it recapitulates the charge change associated with the modification, but not the steric effects of malonylation. **(D)** Representative immunoblotting (IB) of pan-lysine malonylation (Kmal), mTOR, and actin as loading control, of immunoprecipitated (IP) mTOR (right) and the respective total lysates (left) from control or FASN silenced (FASN<sup>KD</sup>) ECs, expressing either wildtype *mTOR* (mTOR<sup>WT</sup>) or mTOR harboring a K1218R mutation (mTOR<sup>K->R</sup>, precluding malonylation). IgG, negative control for IP. Densitometric quantification of the malonylated mTOR to total mTOR ratio (Kmal/mTOR), expressed relative to control, is shown beneath the blot. Endogenous *mTOR* was not silenced to avoid overt toxicity owing to high viral load in otherwise triple transduced cells. The residual increase of the Kmal signal in mTOR<sup>K->R</sup> ECs results from endogenous wild type mTOR (n=3). **(E)** Representative immunoblots of FASN (to check FASN silencing), mTOR (to assess mTOR (re-)expression), pan-lysine malonylation (Kmal) (to determine induction of mTOR malonylation upon FASN<sup>KD</sup>), total and phosphorylated p70S6K (mTORC1 target) and actin as loading control, in control and FASN<sup>KD</sup> ECs silenced for endogenous mTOR (mTOR<sup>KD</sup>) and re-expressing mTOR<sup>WT</sup>, or mTOR<sup>K->R</sup> (precluding malonylation). Densitometric quantification of p-

p70S6K/p70S6K ratio, expressed relative to control, is shown beneath the blot (n=3). **(F)** Total sprout length in spheroids of control (ctrl) and *FASN* silenced (*FASN*<sup>KD</sup>) ECs overexpressing wildtype *mTOR* (*mTOR*<sup>WT</sup>) or *mTOR*<sup>K->R</sup> after *mTOR* silencing (n=4). **(G)** Representative immunoblots of total and phosphorylated Akt (*mTORC2* downstream target), and actin as loading control, in control and orlistat treated ECs silenced for endogenous *mTOR* (*mTOR*<sup>KD</sup>) and re-expressing *mTOR*<sup>WT</sup>, *mTOR*<sup>K->E</sup>, or *mTOR*<sup>K->R</sup> (n=3). Densitometric quantification of p-Akt/Akt ratio, expressed relative to control, is shown beneath the blot. **(H,I)** Representative immunoblots for *FASN* (to check *Fasn* KO), pan-lysine malonylation (Kmal, to assess the *FASN*-KO induction of Kmal), and total and phosphorylated p70S6K (H), or for *FASN* and total and phosphorylated Akt (I) in murine liver ECs isolated from adult wildtype (*FASN*<sup>WT</sup>) or endothelial-specific *Fasn* KO (*FASN*<sup>ΔEC</sup>) mice (n=3). Actin was used as loading control. Densitometric quantification of the p-p70S6K/p70S6K (H) or p-Akt/Akt ratios (I), expressed relative to control, is shown beneath each blot. **(J-L)** Quantification of lung sections isolated from *FASN*<sup>WT</sup> or *FASN*<sup>ΔEC</sup> mice, stained for EC marker CD34, and *FASN* (J) or phosphorylated *mTORC1* target p70S6K (p-70S6K) (K) or 4EBP1 (p-4EBP1) (L). The number of *FASN*<sup>+</sup> CD34<sup>+</sup>, p-p70S6K<sup>+</sup> CD34<sup>+</sup>, and p-4EBP1<sup>+</sup> CD34<sup>+</sup> cells per field was quantified (n=4). Data are mean ± SEM. \* p < 0.05 by t-test (panels H-L) or ANOVA (rest of panels).

**TABLE S1: MALONYLATED PROTEINS IN FASN SILENCED CELLS THAT HAVE BEEN IDENTIFIED IN PREVIOUS MALONYLATION PEPTIDE SCREENS (RELATED TO FIGURE 5).**

| Accession <sup>a</sup>                                | Identifier <sup>a</sup> | Name                                               | Malonylated peptide sequence <sup>b</sup> | Start position <sup>b</sup> | Previous references <sup>c</sup> |
|-------------------------------------------------------|-------------------------|----------------------------------------------------|-------------------------------------------|-----------------------------|----------------------------------|
| Glycolysis and Pentose Phosphate pathway <sup>d</sup> |                         |                                                    |                                           |                             |                                  |
| P52209                                                | 6PGD                    | 6-phosphogluconate dehydrogenase, decarboxylating  | TVSKVDDFLANEAK                            | 35                          | D,C,N                            |
| P04075                                                | ALDOA                   | Fructose-bisphosphate aldolase A                   | VDKGVVPLAGTNGETTTQGLDGLSER                | 109                         | D,C,N                            |
| P06733                                                | ENOA                    | Alpha-enolase                                      | YGKDATNVGDEGGFAPNILENK                    | 200                         | D,C,N                            |
| P04406                                                | G3P                     | Glyceraldehyde-3-phosphate dehydrogenase           | TVDGPSGKLWR                               | 187                         | D,C,N                            |
|                                                       |                         |                                                    | GALQNIIPASTGAAKAVGK                       | 201                         |                                  |
| P00558                                                | PGK1                    | Phosphoglycerate kinase 1                          | VDFNVPMKNNQITNNQR                         | 23                          | D,C,N                            |
|                                                       |                         |                                                    | ALESPERPFLAILGGAKVADK                     | 200                         |                                  |
| P15259                                                | PGAM2                   | Phosphoglycerate mutase 2                          | HYGGLTGLNKAETAAK                          | 91                          | C,D                              |
| P14618                                                | KPYM                    | Pyruvate kinase PKM                                | GADFLVTEVENGGSLGSKK                       | 189                         | C, N, D                          |
| P29401                                                | TKT                     | Transketolase                                      | VGDKIATR                                  | 311                         | C, N, D                          |
| Cytoskeletal regulation                               |                         |                                                    |                                           |                             |                                  |
| P60709                                                | ACTB                    | Actin, cytoplasmic 1                               | HQGVVMVGMGQKDSYVGDQAQSK                   | 40                          | D,N                              |
| P61160                                                | ARP2                    | Actin-related protein 2                            | SEFYKHIVLSGGSTMYPGLPSR                    | 295                         | C,N                              |
| O15143                                                | ARC1B                   | Actin-related protein 2/3 complex subunit 1B       | IFSAYIKEVEERPAPTWPWGSK                    | 168                         | C                                |
| P23528                                                | COF1                    | Cofilin-1                                          | LTGIKHELQANCYEEVK                         | 128                         | C,N                              |
|                                                       |                         |                                                    | HELQANCYEEVKDR                            | 133                         |                                  |
| P60660                                                | MYL6                    | Myosin light polypeptide 6                         | NKDQGTIEDYVEGLR                           | 80                          | C                                |
| P35579                                                | MYH9                    | Myosin-9                                           | DDIQKMNPPK                                | 70                          | C                                |
|                                                       |                         |                                                    | HSQAVEELAEQLEQTKR                         | 1194                        |                                  |
| P07737                                                | PROF1                   | Profilin-1                                         | TKSTGGAPTFNVTVTK                          | 90                          | C, N                             |
|                                                       |                         |                                                    | STGGAPTFNVTVTKTDK                         | 92                          |                                  |
| Integrin signaling pathway                            |                         |                                                    |                                           |                             |                                  |
| P21333                                                | FLNA                    | Filamin-A                                          | VGTECGNQKVR                               | 570                         | C                                |
|                                                       |                         |                                                    | TGVAVNKPAEFTVDAKHGGK                      | 685                         |                                  |
|                                                       |                         |                                                    | GLGLSKAYVGQK                              | 2564                        |                                  |
| O75369                                                | FLNB                    | Filamin-B                                          | APLKIFAQDGEQQR                            | 678                         | C                                |
| Q9Y490                                                | TLN1                    | Talin-1                                            | TVKAVEDEATK                               | 2131                        | C,N                              |
| Other pathways                                        |                         |                                                    |                                           |                             |                                  |
| P07108                                                | ACBP                    | Acyl-CoA-binding protein                           | TKPSDEEMLFIYGHYK                          | 18                          | D,C,N                            |
| P05141                                                | ADT2                    | ADP/ATP translocase 2                              | DFLAGGVAIAISKTAVAPIER                     | 11                          | D, C                             |
| P12236                                                | ADT3                    | ADP/ATP translocase 3                              | DFLAGGIAIAAISKTAVAPIER                    | 11                          | C                                |
| P04083                                                | ANXA1                   | Annexin 1                                          | DLAKDITSDTSGDFR                           | 163                         | C                                |
| P07355                                                | ANXA2                   | Annexin A2                                         | TDLEKDIISDTSGDFR                          | 153                         | C                                |
| P08133                                                | ANXA6                   | Annexin A6                                         | PANDFNPDADAKALR                           | 359                         | C, N, D                          |
| Q8N3C0                                                | ASCC3                   | Activating signal cointegrator 1 complex subunit 3 | ELTGDMQLSKSEILR                           | 563                         | C,N,D                            |

|        |       |                                                         |                            |      |         |
|--------|-------|---------------------------------------------------------|----------------------------|------|---------|
| O00299 | CLIC1 | Chloride intracellular channel protein 1                | FSAYIKNSNPALNDNLEK         | 114  | C       |
| Q13620 | CUL4B | Cullin-4B                                               | GKDIEDGDK                  | 799  | C       |
| P04080 | CYTB  | Cystatin-B                                              | FPVFKAVSFK                 | 35   | C       |
|        |       |                                                         | AKHDELTYF                  | 90   |         |
| Q92499 | DDX1  | ATP-dependent RNA helicase DDX1                         | TKIDCDNLEQYFIQQGGGPK       | 515  | C       |
| Q14204 | DYHC1 | Cytoplasmic dynein 1 heavy chain 1                      | SFDSEFKLACK                | 4277 | C,N     |
| P68104 | EF1A1 | Elongation factor 1-alpha 1                             | EVSTYIKK                   | 173  | C, N, D |
|        |       |                                                         | LPLQDVYKIGGIGTVPVGR        | 248  |         |
| Q01469 | FABP5 | Fatty acid-binding protein, epidermal                   | TESTLKTQFSCTLGK            | 56   | C       |
| P14324 | FPP5  | Farnesyl pyrophosphate synthase                         | EVLEYNAIGGKYNR             | 113  | C,D     |
| P48506 | GSH1  | Glutamate--cysteine ligase catalytic subunit            | DICKGGNAVVDGCGK            | 489  | D,C,N   |
| P78417 | GSTO1 | Glutathione S-transferase omega-1                       | SLGKGSAPPGPVPEGSIR         | 8    | C,N     |
| O60814 | H2B1K | Histone H2B type 1-K                                    | LLLPGELAKHAVSEGTK          | 101  | D,C     |
| P17096 | HMGAI | High mobility group protein HMG-I/HMG-Y                 | KQPPVSPGTALVGSQKEPSEVPTPK  | 31   | C       |
| P52272 | HNRPM | Heterogeneous nuclear ribonucleoprotein M               | GCGVVKFESPEVAER            | 693  | C       |
| P11142 | HSP7C | Heat shock cognate 71 kDa protein                       | NQTAEKEEFHQKKELEK          | 584  | C, N, D |
| P04792 | HSPB1 | Heat shock protein beta-1                               | DGVVEITGKHEER              | 115  | C       |
| Q14145 | KEAP1 | Kelch-like ECH-associated protein 1                     | EQGMEVVSIIEGHPKVMER        | 117  | C       |
| P83111 | LACTB | Serine beta-lactamase-like protein LACTB, mitochondrial | KKNDFEQGELYLR              | 283  | D,C,N   |
| P09382 | LEG1  | Galectin-1                                              | GEVAPDAKSFVLNLGK           | 22   | C       |
| P14174 | MIF   | Macrophage migration inhibitory factor                  | SYSKLLCGLLAER              | 75   | C       |
| P42345 | MTOR  | Serine/threonine-protein kinase mTOR                    | IVKGYTLADEEEDPLIYQHR       | 1216 | C       |
| P06748 | NPM   | Nucleophosmin                                           | ADKDYHFKVDNDENEHQLSLR      | 25   | C       |
| A6NDG6 | PGP   | Phosphoglycolate phosphatase                            | NNQESDCVSKK                | 291  | C       |
| Q9Y3A3 | PHOCN | MOB-like protein phocein                                | HTLDGAACLLNSNKYFPSR        | 127  | C       |
| P62937 | PPIA  | Peptidyl-prolyl cis-trans isomerase A                   | SIYGEKFEDENFILK            | 77   | C, N, D |
|        |       |                                                         | TEWLDGKHVVFGK              | 119  |         |
| Q9UMS4 | PRP19 | Pre-mRNA-processing factor 19                           | GKTVPEELVKPEELSK           | 191  | C       |
| P25789 | PSA4  | Proteasome subunit alpha type-4                         | ATCIGNNSAAAVSMLKQDYK       | 161  | C,N     |
| P61353 | RL27  | 60S ribosomal protein L27                               | AVIVKNIDDGTSRDPYSHALVAGIDR | 23   | D,C,N   |
| Q9P2E9 | RRBP1 | Ribosome-binding protein 1                              | SKCEELSGLHGQLQEAR          | 931  | C,N     |
| O75396 | SC22B | Vesicle-trafficking protein SEC22b                      | DLQQYQSQAQQLFR             | 29   | C       |
| O00193 | SMAP  | Small acidic protein                                    | INEELESQYQQSMDSKLSGR       | 76   | C       |
| P49458 | SRP09 | Signal recognition particle 9 kDa protein               | VTDDLVLVYKTDQAQDVK         | 42   | C       |
| P23381 | SYWC  | Tryptophan--tRNA ligase, cytoplasmic                    | MSASDPNSSIFLDTAKQIK        | 350  | C       |
| P17987 | TCPA  | T-complex protein 1 subunit alpha                       | SLHDALCVVKR                | 391  | C, N, D |
|        |       |                                                         | DTEPLIQTAKTTLGSK           | 161  |         |
| Q15185 | TEBP  | Prostaglandin E synthase 3                              | DVNVNFEKSK                 | 26   | C, N    |
| Q9Y277 | VDAC3 | Voltage-dependent anion-selective channel protein 3     | YKVCNYGLTFTQK              | 62   | D,C,N   |
| P08670 | VIME  | Vimentin                                                | SKFADLSEAAANR              | 293  | C       |

|        |       |                                 |                           |     |   |
|--------|-------|---------------------------------|---------------------------|-----|---|
| Q8IWA0 | WDR75 | WD repeat-containing protein 75 | SEQPTLVTA <b>S</b> KDGYFK | 456 | C |
|--------|-------|---------------------------------|---------------------------|-----|---|

(<sup>a</sup>) For each malonylated protein, the Uniprot accession number and identifier are indicated.

(<sup>b</sup>) Sequence of the peptide containing the modified lysine (red) and the position in the protein sequence of the start residue in the peptide are shown.

(<sup>c</sup>) C = Colak et al., 2015; D = Du et al., 2015; N = Nishida et al., 2015.

(<sup>d</sup>) Malonylation of glycolytic enzymes can lower their enzymatic activity, as seen in other cell types (Du et al., 2015; Kulkarni et al., 2017; Nishida et al., 2015). In our study, we did not observe a reduction in glycolytic flux in ECs upon FASN inhibition. While the precise reasons remain to be identified, hypothetical non-exclusive explanations include: (i) Cell type-specific differences in the regulation of metabolic pathways (glycolysis); we previously reported that EC metabolism differs from other cell types (De Bock et al., 2013; Schoors et al., 2015) and that ECs are glycolysis-addicted and thus attempt to maintain high glycolysis levels (De Bock et al., 2013), (ii) maintaining glycolysis to compensate for the reduced FAO flux, (iii) insufficient malonylation of glycolytic enzymes (Kulkarni et al., 2017).

**TABLE S2:** AMINO ACID SEQUENCE CONSERVATION SURROUNDING LYSINE 1218 IN MTOR FOR DIFFERENT SPECIES (RELATED TO FIGURE 6).

| Species      | Species (latin)                   | Sequence <sup>a</sup> | Position of the lysine <sup>b</sup> | Validation <sup>c</sup> |
|--------------|-----------------------------------|-----------------------|-------------------------------------|-------------------------|
| Human        | <i>Homo sapiens</i>               | ICRIVKGYTLA           | 1218                                | Yes                     |
| Mouse        | <i>Mus musculus</i>               | ICRIVKGYTLA           | 1218                                | Yes                     |
| Rat          | <i>Rattus norvegicus</i>          | ICRIVKGYTLA           | 1218                                | Yes                     |
| Giant panda  | <i>Ailuropoda melanoleuca</i>     | ICRIVKGYTLA           | 1218                                | No                      |
| Alligator    | <i>Alligator mississippiensis</i> | ICRIVKGYTLA           | 1218                                | No                      |
| Lizard       | <i>Anolis carolinensis</i>        | ICRIVKGYTLA           | 1219                                | No                      |
| Cattle       | <i>Bos taurus</i>                 | ICRIVKGYTLA           | 1218                                | No                      |
| Dog          | <i>Canis familiaris</i>           | ICRIVKGYTLA           | 1218                                | No                      |
| Goat         | <i>Capra hircus</i>               | ICRIVKGYTLA           | 1218                                | No                      |
| Guinea pig   | <i>Cavia porcellus</i>            | ICRIVKGYTLA           | 1218                                | No                      |
| Green monkey | <i>Chlorocebus sabaues</i>        | ICRIVKGYTLA           | 1218                                | No                      |
| Cat          | <i>Felis catus</i>                | ICRIVKGYTLA           | 1218                                | No                      |
| Gorilla      | <i>Gorilla gorilla gorilla</i>    | ICRIVKGYTLA           | 1218                                | No                      |
| Squirrel     | <i>Ictidomys tridecemlineatus</i> | ICRIVKGYTLA           | 1218                                | No                      |
| Elephant     | <i>Loxodonta africana</i>         | ICRIVKGYTLA           | 1218                                | No                      |
| Macaque      | <i>Macaca mulatta</i>             | ICRIVKGYTLA           | 1218                                | No                      |
| Opossum      | <i>Monodelphis domestica</i>      | ICRIVKGYTLA           | 1217                                | No                      |
| Ferret       | <i>Mustela putorius furo</i>      | ICRIVKGYTLA           | 1218                                | No                      |
| Bat          | <i>Myotis lucifugus</i>           | ICRIVKGYTLA           | 1217                                | No                      |
| Rabbit       | <i>Oryctolagus cuniculus</i>      | ICRIVKGYTLA           | 1218                                | No                      |
| Galago       | <i>Otolemur garnettii</i>         | ICRIVKGYTLA           | 1218                                | No                      |
| Sheep        | <i>Ovis aries</i>                 | ICRIVKGYTLA           | 1218                                | No                      |
| Baboon       | <i>Papio anubis</i>               | ICRIVKGYTLA           | 1217                                | No                      |
| Wild boar    | <i>Sus scrofa</i>                 | ICRIVKGYTLA           | 1218                                | No                      |

All mTOR amino acid sequences were obtained from Uniprot.

(<sup>a</sup>) For each species, the 5 amino acids flanking either side of lysine 1218 are shown.

(<sup>b</sup>) In some species (highlighted in blue) the lysine is located on position 1217 or 1219.

(<sup>c</sup>) Yes: confirmed expression of mTOR at the protein level. No: putative mTOR protein expression was inferred from genetic sequence homology in those species to human.
